# Supplementary material for: Quantitative In Vivo Detection of Chlamydia muridarum Associated Inflammation in a Mouse Model Using Optical Imaging
Source: Hindawi journal article supplement (doi:10.1155/2015/264897), 2015-01-01
Supplement: f1 [file 264897.f1.pdf]

Table S1

| Incidence (%) and Severity of Histomorphologic Findings in Mice Infected with <i>C. muridarum</i> |      |      |      |      |       |      |      |      |
|---------------------------------------------------------------------------------------------------|------|------|------|------|-------|------|------|------|
| Days post-infection                                                                               | 7    |      | 10   |      | 14    |      | 21   |      |
| Vaccination Status                                                                                | N    | V    | N    | V    | N     | V    | N    | V    |
| # Mice evaluated                                                                                  | 15   | 5    | 5    | 5    | 25    | 9    | 15   | 5    |
| <b>Ovarian Bursa</b>                                                                              |      |      |      |      |       |      |      |      |
| Inflammation-acute                                                                                | 67   | 40   | 80   | 60   | 96    | -    | 7    | -    |
|                                                                                                   | vs-m | m    | m-mk | m    | s-mk  |      | s    |      |
| Inflammation-chronic                                                                              | -    | -    | -    | -    | -     | 11   | 67   | 40   |
|                                                                                                   |      |      |      |      |       | s    | vs-s | s    |
| Dilatation                                                                                        | 13   | 60   | 100  | 60   | 72    | -    | -    | 20   |
|                                                                                                   | vs-s | vs-s | vs-s | vs-s | vs-m  |      |      | vs   |
| <b>Oviduct</b>                                                                                    |      |      |      |      |       |      |      |      |
| Inflammation-acute                                                                                | 60   | 40   | 80   | 60   | 96    | -    | 7    | -    |
|                                                                                                   | vs-m | m    | mk   | m-mk | vs-mk |      | vs   |      |
| Inflammation-chronic                                                                              | -    | -    | -    | -    | -     | -    | 87   | 40   |
|                                                                                                   |      |      |      |      |       |      | vs-m | vs-s |
| Dilatation                                                                                        | 7    | 20   | 80   | 60   | 32    | 22   | 53   | -    |
|                                                                                                   | vs   | vs   | s-m  | vs-s | vs-s  | vs-m | vs-m |      |
| <b>Uterus</b>                                                                                     |      |      |      |      |       |      |      |      |
| Inflammation-acute                                                                                | 87   | 60   | 100  | 80   | 92    | -    | -    | -    |
|                                                                                                   | vs-s | vs-s | vs-m | vs-s | vs-m  |      |      |      |
| Inflammation-chronic                                                                              | -    | -    | -    | -    | -     | 11   | 100  | 40   |
|                                                                                                   |      |      |      |      |       | vs   | vs-m | vs-s |
| Cystic Endometrium                                                                                | -    | -    | 20   | -    | 12    | 11   | 47   | 40   |
|                                                                                                   |      |      | vs   |      | vs    | vs   | vs   | s    |
| Decidual reaction                                                                                 | -    | -    | -    | -    | 12    | -    | 40   | -    |
|                                                                                                   |      |      |      |      | vs-m  |      | vs-m |      |
| Hemorrhage                                                                                        | -    | -    | -    | -    | 12    | -    | 27   | -    |
|                                                                                                   |      |      |      |      | p     |      | p    |      |
| N=not vaccinated; V= EB vaccinated                                                                |      |      |      |      |       |      |      |      |
| vs = very slight; s=slight, m=moderate, mk=marked, p=present                                      |      |      |      |      |       |      |      |      |
| - = No noteworthy change                                                                          |      |      |      |      |       |      |      |      |

A detailed histopathologic summary of findings in reproductive tracts of female mice infected with *C. muridarum*. Mice were sacrificed at the indicated time point and the reproductive tracts were prepared for histopathology assessment as described in the methods. The data presented here is a compilation of several studies. The numbers indicate the percentage of mice that had findings. Severity was graded semi-quantitatively on a scale of 1 to 5 according to routine procedures (1=very slight, 2=slight, 3=moderate, 4=marked, and 5=severe). Acute inflammation was mostly neutrophilic while chronic inflammation was lymphocytic in nature.
